# Supplementary material
Source: PubMed Central journal article supplement (PMC6058965)

# Supplementary Figure 1

## Extended Data Figure 4c

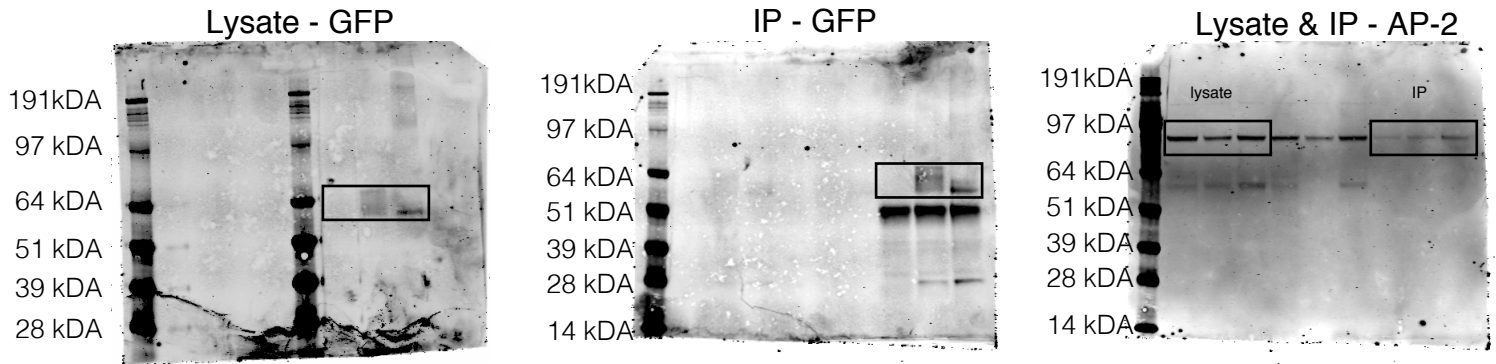

## Extended Data Figure 6e

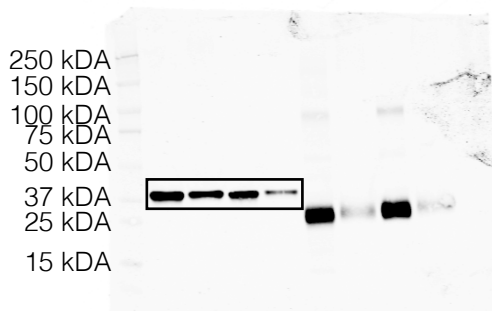

## Extended Data Figure 9f

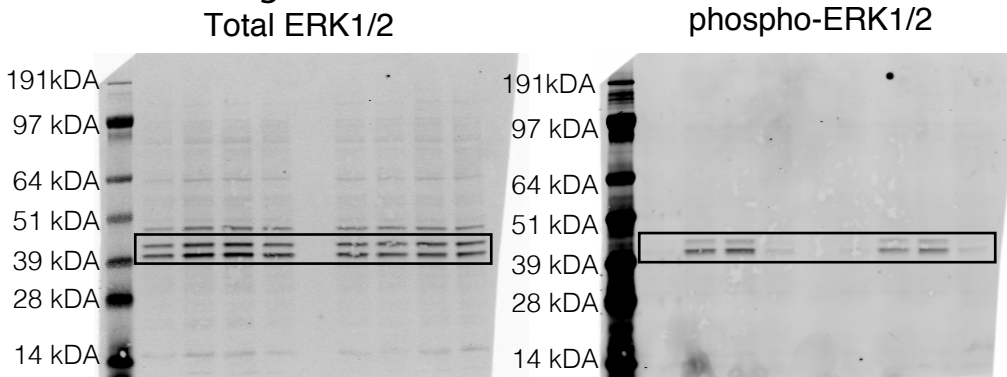

## Extended Data Figure 9h

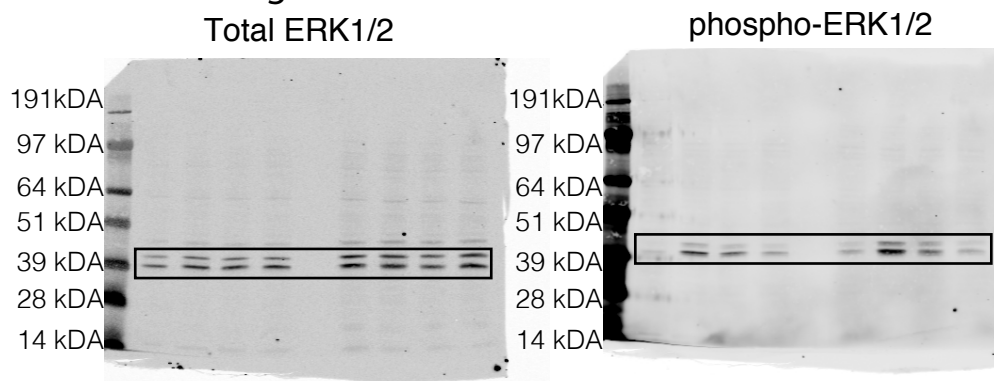

Supplement: NIHMS953208-supplement-Supplementary_Figure_1.pdf [file NIHMS953208-supplement-Supplementary_Figure_1.pdf]
