# Supplementary material
Source: PubMed Central journal article supplement (PMC6058965)
Supplement: NIHMS953208-supplement-Supplementary_Legends.pdf [file NIHMS953208-supplement-Supplementary_Legends.pdf]

**Supplementary Figure 1. Uncropped Western blots with molecular weight markers and indication of cropped region.**

**Supplementary Video 1 sptPALM video of PA-mCherry- $\beta$ 1AR.** HEK 293 cells were co-transfected with PA-mCherry- $\beta$ 1AR and CLC-GFP and treated with 10  $\mu$ M isoproterenol. Shown are single-molecule images of PA-mCherry- $\beta$ 1AR. This is a representative video from 2 independent experiments.

**Supplementary Video 2 Representative sptPALM video of PA-mCherry- $\beta$ 2AR.** HEK 293 cells were co-transfected with FLAG- $\beta$ 1AR, PA-mCherry- $\beta$ 2AR, and CLC-GFP and treated with 10  $\mu$ M isoproterenol. Shown are single-molecule images of PA-mCherry- $\beta$ 2AR. This is a representative video from at least 3 independent experiments.

**Supplementary Video 3 Representative sptPALM video of  $\beta$ -arrestin-2-PA-mCherry after activation of  $\beta$ 1AR.** HEK 293 cells were co-transfected with FLAG- $\beta$ 1AR,  $\beta$ -arrestin-2-PA-mCherry, and CLC-GFP and treated with 10  $\mu$ M isoproterenol. Shown are single-molecule images of  $\beta$ -arrestin-2-PA-mCherry. This is a representative video from at least 3 independent experiments.

**Supplementary Video 4 Representative sptPALM video of  $\beta$ -arrestin-2-PA-mCherry after activation of  $\beta$ 2AR.** HEK 293 cells were co-transfected with FLAG- $\beta$ 2AR,  $\beta$ -arrestin-2-PA-mCherry, and CLC-GFP and treated with 10  $\mu$ M isoproterenol. Shown are single-molecule images of  $\beta$ -arrestin-2-PA-mCherry. This is a representative video from at least 3 independent experiments.

**Supplementary Video 5 Representative sptPALM video of  $\beta$ -arrestin-2-PA-mCherry (CCS mutant) after activation of  $\beta$ 1AR.** HEK 293 cells were co-transfected with FLAG- $\beta$ 1AR,  $\beta$ -arrestin-2-PA-mCherry (CCS mutant), and CLC-GFP and treated with 10  $\mu$ M isoproterenol. Shown are single-molecule images of  $\beta$ -arrestin-2-PA-mCherry (CCS mutant). This is a representative video from at least 3 independent experiments.

**Supplementary Video 6 Representative sptPALM video of  $\beta$ -arrestin-2-PA-mCherry (CCS mutant) after activation of  $\beta$ 2AR.** HEK 293 cells were co-transfected with FLAG- $\beta$ 2AR,  $\beta$ -arrestin-2-PA-mCherry (CCS mutant), and CLC-GFP and treated with 10  $\mu$ M isoproterenol. Shown are single-molecule images of  $\beta$ -arrestin-2-PA-mCherry (CCS mutant). This is a representative video from at least 3 independent experiments.
